# Supplementary material for: Associations between stopping prescriptions for opioids, length of opioid treatment, and overdose or suicide deaths in US veterans: observational evaluation
Source: PubMed Central journal article supplement — BMJ. 2020 Mar 4;368:m283. doi: 10.1136/bmj.m283 (PMC7249243; doi:10.1136/bmj.m283), 2020-03-04
Supplement: olie051219.ww.pdf [file olie051219.ww.pdf]

**Appendix 1. International Classification of Diseases, Tenth Revision (ICD-10) codes used to identify overdose and suicide mortality**

| Overdose- and Suicide-<br>Related mortality | ICD-10 Codes                                                                                                                                                                                                                                                                                                                                                                                                                                                                                                                                                                                                                                                                                                                                                                                                                                                                      |
|---------------------------------------------|-----------------------------------------------------------------------------------------------------------------------------------------------------------------------------------------------------------------------------------------------------------------------------------------------------------------------------------------------------------------------------------------------------------------------------------------------------------------------------------------------------------------------------------------------------------------------------------------------------------------------------------------------------------------------------------------------------------------------------------------------------------------------------------------------------------------------------------------------------------------------------------|
| Overdose-related mortality                  | <p>X40-X45, X60-X65, X85, Y10-Y15, Y45</p> <p><i>Additional codes related to opioid poisoning mortality:</i><br/>T400X1, T40X2, T400X3, T400X4, T400X5, T401X1-T401X4, T402X1-T402X5, T403X1-T403X5, T404X1-T404X5, T40601-T40605, T40691-T40695</p> <p><i>Additional codes related to sedative poisoning mortality:</i><br/>T410X1-T410X5, T411X1-T411X5, T41201-T41205, T41291-T41295, T413X1-T413X5, T414X1-T414X5, T423X1-T423X5, T426X1-T426X5, T428X1-T428X5, T433X1-T433X5, T434X1-T434X5, T43501-T43505, T43591-T43595, T424X1-T424X5, T43591-T43595, T4151, T4152, T4153, T4544, T4155</p> <p><i>Additional codes related to acetaminophen poisoning mortality:</i> T391X-T395X, T398X, T399X</p> <p><i>Additional codes related to other drug poisoning mortality:</i><br/>T507X1-T507X5, T407X1-T407X5, T408X1-T408X5, T44901-T44905, T44991-T44995, T507X1-T507X5</p> |
| Suicide-related mortality                   | <p>X7, X60-X84, U03, Y87, T360X2-T360X5, T361X2-T361X5, T362X2-T362X5, T363X2-T363X5, T364X2-T364X5, T365X2-T365X5, T366X2-T366X5, T367X2-T367X5, T368X2-T368X5, T3692-T3698, T1491, R45851, T407-T409, T4-T6, T70, T712</p>                                                                                                                                                                                                                                                                                                                                                                                                                                                                                                                                                                                                                                                      |

## Appendix 2. Heuristic summary of data assembly method

Identified all veterans who received an opioid prescription in Fiscal Year 2013 (FY 2013- October 1, 2012 to September 30, 2013)

### **Data collection and analysis sample definition:**

1. Non time-varying covariates calculated based on patient medical record data from FY2013 (e.g., age, mental health diagnoses)
2. Looked backward in time (5 years) from the last date of opioid prescription in FY 2013 to find the start date of opioid therapy and calculate the duration of opioid treatment episode that was classified into four categories:  
    ≤30 days, 31-90 days, 91-400 days, and >400 days
3. Left censored all opioid episode data before FY 2013
4. Outcomes observed from the first date of opioid prescription receipt in FY 2013 to the end of FY 2014:
  - a. Date of opioid cessation (modelled as a time-varying parameter)
  - b. Date of overdose and/or suicide (outcome of interest)
5. Right censor patients at the time of death or the end of observation, whichever comes first

**Survival analysis** with time of opioid cessation as a time-varying parameter and testing its interaction with duration of opioid treatment:

1. Parameter estimates of overdose/suicide mortality at the time of opioid cessation by opioid treatment duration category
2. Adjusted hazards ratio estimates for overdose/suicide with opioid cessation among the 4 opioid treatment duration categories

**Lifetable analyses:** Actual observed overdose/suicide mortality rates were calculated every 25 days and displayed in following ways:

- a. After opioid cessation for all patients with opioid cessation
- b. After the start of opioids for all patients who initiated an opioid episode in FY 2013
- c. After opioid cessation for all patients with opioid cessation categorized by the duration of opioid treatment episode



|                                           |     |     |      |           |     |     |      |              |
|-------------------------------------------|-----|-----|------|-----------|-----|-----|------|--------------|
| Long-acting                               | .51 | .10 | 1.67 | 1.37-2.03 | .34 | .12 | 1.40 | 1.10 to 1.79 |
| Short-acting                              | .15 | .07 | 1.16 | 1.01-1.34 | .15 | .08 | 1.16 | .99 to 1.37  |
| Log maximum daily morphine mg equivalents | .40 | .04 | 1.50 | 1.40-1.61 | .29 | .05 | 1.33 | 1.22 to 1.45 |

\*Hazard ratios and associated 95% confidence intervals are not estimated for these variables given that these are interaction models. To better understand the interactions, for overdose mortality, the estimated hazard ratios for patients with opioid cessation (with all other covariates at their reference) were 1.39 ( $\leq 30$  days), 2.41 (31-90 days), 3.25 (91-400 days), and 5.65 ( $>400$  days) and for suicide mortality, the estimated hazard ratios for patients with opioid cessation (with all other covariates at their reference) were 2.02 ( $\leq 30$  days), 3.43 (31-90 days), 4.78 (91-400 days), and 7.99 ( $>400$  days).

CI=Confidence Interval; FY=Fiscal Year

**Appendix 4. Full life table data for deaths from overdose or suicide over time (in 25-day intervals) while on opioids—for patients who initiated opioids in FY2013—and after stopping treatment with opioids**

| 25-Day Interval                                                     | Overdose/<br>Suicide<br>Deaths | Number<br>Censored | Sample<br>Size | Conditional<br>Probability of<br>Overdose/<br>Suicide Death | Conditional<br>Probability<br>Standard<br>Error | Overdose/Suicide<br>Deaths per<br>100,000 Patients |
|---------------------------------------------------------------------|--------------------------------|--------------------|----------------|-------------------------------------------------------------|-------------------------------------------------|----------------------------------------------------|
| <b>Patients Who Initiated Opioids in FY2013 (After Initiation)</b>  |                                |                    |                |                                                             |                                                 |                                                    |
| 1-25                                                                | 88                             | 39437              | 933199.5       | 0.000094                                                    | 0.000010                                        | 9.4                                                |
| 26-50                                                               | 59                             | 40928              | 892929         | 0.000066                                                    | 0.000009                                        | 6.6                                                |
| 51-75                                                               | 42                             | 33854              | 855479         | 0.000049                                                    | 0.000008                                        | 4.9                                                |
| 76-100                                                              | 32                             | 33507              | 821756.5       | 0.000039                                                    | 0.000007                                        | 3.9                                                |
| 101-125                                                             | 23                             | 31240              | 789351         | 0.000029                                                    | 0.000006                                        | 2.9                                                |
| 126-150                                                             | 35                             | 30658              | 758379         | 0.000046                                                    | 0.000008                                        | 4.6                                                |
| 151-175                                                             | 24                             | 27919              | 729055.5       | 0.000033                                                    | 0.000007                                        | 3.3                                                |
| 176-200                                                             | 29                             | 28661              | 700741.5       | 0.000041                                                    | 0.000008                                        | 4.1                                                |
| 201-225                                                             | 24                             | 27567              | 672598.5       | 0.000036                                                    | 0.000007                                        | 3.6                                                |
| 226-250                                                             | 17                             | 24233              | 646674.5       | 0.000026                                                    | 0.000006                                        | 2.6                                                |
| 251-275                                                             | 29                             | 23793              | 622644.5       | 0.000047                                                    | 0.000009                                        | 4.7                                                |
| 276-300                                                             | 9                              | 20660              | 600389         | 0.000015                                                    | 0.000005                                        | 1.5                                                |
| 301-325                                                             | 12                             | 21320              | 579390         | 0.000021                                                    | 0.000006                                        | 2.1                                                |
| 326-350                                                             | 8                              | 20271              | 558582.5       | 0.000014                                                    | 0.000005                                        | 1.4                                                |
| 351-375                                                             | 14                             | 28029              | 534424.5       | 0.000026                                                    | 0.000007                                        | 2.6                                                |
| 376-400                                                             | 4                              | 43787              | 498502.5       | 0.000008                                                    | 0.000004                                        | 0.8                                                |
| 401-425                                                             | 12                             | 41789              | 455710.5       | 0.000026                                                    | 0.000008                                        | 2.6                                                |
| 426-450                                                             | 5                              | 44753              | 412427.5       | 0.000012                                                    | 0.000005                                        | 1.2                                                |
| 451-475                                                             | 7                              | 37344              | 371374         | 0.000019                                                    | 0.000007                                        | 1.9                                                |
| 476-500                                                             | 13                             | 40948              | 332221         | 0.000039                                                    | 0.000011                                        | 3.9                                                |
| 501-525                                                             | 3                              | 37263              | 293102.5       | 0.000010                                                    | 0.000006                                        | 1.0                                                |
| 526-550                                                             | 5                              | 37141              | 255897.5       | 0.000020                                                    | 0.000009                                        | 2.0                                                |
| 551-575                                                             | 8                              | 36126              | 219259         | 0.000036                                                    | 0.000013                                        | 3.6                                                |
| 576-600                                                             | 7                              | 32760              | 184808         | 0.000038                                                    | 0.000014                                        | 3.8                                                |
| 601-625                                                             | 2                              | 36323              | 150259.5       | 0.000013                                                    | 0.000009                                        | 1.3                                                |
| 626-650                                                             | 0                              | 27131              | 118530.5       | 0                                                           | 0                                               | 0                                                  |
| 651-675                                                             | 3                              | 36202              | 86864          | 0.000035                                                    | 0.000020                                        | 3.5                                                |
| 676-700                                                             | 0                              | 28668              | 54426          | 0                                                           | 0                                               | 0                                                  |
| 701-725                                                             | 1                              | 31469              | 24357.5        | 0.000041                                                    | 0.000041                                        | 4.1                                                |
| 726-750                                                             | 0                              | 8622               | 4311           | 0                                                           | 0                                               | 0                                                  |
| 751-775                                                             | 0                              | 0                  | 0              | 0                                                           | 0                                               | 0                                                  |
| <b>Patients Who Stopped Treatment with Opioids (After Stopping)</b> |                                |                    |                |                                                             |                                                 |                                                    |
| 1-25                                                                | 344                            | 50325              | 774505.5       | 0.000444                                                    | 0.000024                                        | 44.4                                               |
| 26-50                                                               | 174                            | 50971              | 723513.5       | 0.000240                                                    | 0.000018                                        | 24.0                                               |

|           |     |       |          |          |          |      |
|-----------|-----|-------|----------|----------|----------|------|
| 51-75     | 114 | 37647 | 679030.5 | 0.000168 | 0.000016 | 16.8 |
| 76-100    | 90  | 32587 | 643799.5 | 0.000140 | 0.000015 | 14.0 |
| 101-125   | 79  | 28793 | 613019.5 | 0.000129 | 0.000014 | 12.9 |
| 126-150   | 83  | 25452 | 585818   | 0.000142 | 0.000016 | 14.2 |
| 151-175   | 66  | 25255 | 560381.5 | 0.000118 | 0.000014 | 11.8 |
| 176-200   | 57  | 22147 | 536614.5 | 0.000106 | 0.000014 | 10.6 |
| 201-225   | 53  | 22158 | 514405   | 0.000103 | 0.000014 | 10.3 |
| 226-250   | 40  | 19671 | 493437.5 | 0.000081 | 0.000013 | 8.1  |
| 251-275   | 43  | 19232 | 473946   | 0.000091 | 0.000014 | 9.1  |
| 276-300   | 37  | 18971 | 454801.5 | 0.000081 | 0.000013 | 8.1  |
| 301-325   | 32  | 18978 | 435790   | 0.000073 | 0.000013 | 7.3  |
| 326-350   | 23  | 22722 | 414908   | 0.000055 | 0.000012 | 5.5  |
| 351-375   | 24  | 29883 | 388582.5 | 0.000062 | 0.000013 | 6.2  |
| 376-400   | 27  | 33875 | 356679.5 | 0.000076 | 0.000015 | 7.6  |
| 401-425   | 32  | 31115 | 324157.5 | 0.000099 | 0.000017 | 9.9  |
| 426-450   | 12  | 31039 | 293048.5 | 0.000041 | 0.000012 | 4.1  |
| 451-475   | 14  | 30090 | 262472   | 0.000053 | 0.000014 | 5.3  |
| 476-500   | 15  | 29133 | 232846.5 | 0.000064 | 0.000017 | 6.4  |
| 501-525   | 10  | 29487 | 203521.5 | 0.000049 | 0.000016 | 4.9  |
| 526-550   | 5   | 27212 | 175162   | 0.000029 | 0.000013 | 2.9  |
| 551-575   | 9   | 27563 | 147769.5 | 0.000061 | 0.000020 | 6.1  |
| 576-600   | 9   | 25903 | 121027.5 | 0.000074 | 0.000025 | 7.4  |
| 601-625   | 4   | 24313 | 95910.5  | 0.000042 | 0.000021 | 4.2  |
| 626-650   | 3   | 23556 | 71972    | 0.000042 | 0.000024 | 4.2  |
| 651-675   | 2   | 23383 | 48499.5  | 0.000041 | 0.000029 | 4.1  |
| 676-700   | 2   | 23575 | 25018.5  | 0.000080 | 0.000057 | 8.0  |
| 701-725   | 3   | 12762 | 6848     | 0.000438 | 0.000253 | 43.8 |
| 726-750   | 0   | 456   | 236      | 0        | 0        | 0    |
| 751-775   | 0   | 2     | 7        | 0        | 0        | 0    |
| 776-800   | 0   | 0     | 6        | 0        | 0        | 0    |
| 801-825   | 0   | 0     | 6        | 0        | 0        | 0    |
| 826-850   | 0   | 1     | 5.5      | 0        | 0        | 0    |
| 851-875   | 0   | 1     | 4.5      | 0        | 0        | 0    |
| 876-900   | 0   | 0     | 4        | 0        | 0        | 0    |
| 901-925   | 0   | 0     | 4        | 0        | 0        | 0    |
| 926-950   | 0   | 0     | 4        | 0        | 0        | 0    |
| 951-975   | 0   | 0     | 4        | 0        | 0        | 0    |
| 976-1000  | 0   | 1     | 3.5      | 0        | 0        | 0    |
| 1001-1025 | 0   | 1     | 2.5      | 0        | 0        | 0    |
| 1026-1050 | 0   | 0     | 2        | 0        | 0        | 0    |
| 1051-1075 | 0   | 1     | 1.5      | 0        | 0        | 0    |

|           |   |   |     |   |   |   |
|-----------|---|---|-----|---|---|---|
| 1076-1100 | 0 | 0 | 1   | 0 | 0 | 0 |
| 1101-1125 | 0 | 0 | 1   | 0 | 0 | 0 |
| 1126-1150 | 0 | 0 | 1   | 0 | 0 | 0 |
| 1151-1175 | 0 | 0 | 1   | 0 | 0 | 0 |
| 1176-1200 | 0 | 1 | 0.5 | 0 | 0 | 0 |
| 1201-1225 | 0 | 0 | 0   | 0 | 0 | 0 |

**Appendix 5. Full life table data for deaths from overdose or suicide over time (in 25-day intervals) by duration on opioids among those who stopped treatment with opioids**

| 25-Day Interval                                                                   | Overdose/<br>Suicide<br>Deaths | Number<br>Censored | Sample<br>Size | Conditional<br>Probability of<br>Overdose/<br>Suicide Death | Conditional<br>Probability<br>Standard<br>Error | Overdose/Suicide<br>Deaths per<br>100,000 Patients |
|-----------------------------------------------------------------------------------|--------------------------------|--------------------|----------------|-------------------------------------------------------------|-------------------------------------------------|----------------------------------------------------|
| <b>Patients Who Stopped Treatment with Opioids (≤30 days Duration on Opioids)</b> |                                |                    |                |                                                             |                                                 |                                                    |
| 1-25                                                                              | 78                             | 15574              | 392898         | 0.000199                                                    | 0.000022                                        | 19.9                                               |
| 26-50                                                                             | 59                             | 15215              | 377425.5       | 0.000156                                                    | 0.00002                                         | 15.6                                               |
| 51-75                                                                             | 40                             | 12657              | 363430.5       | 0.00011                                                     | 0.000017                                        | 11.0                                               |
| 76-100                                                                            | 31                             | 11747              | 351188.5       | 0.000088                                                    | 0.000016                                        | 8.8                                                |
| 101-125                                                                           | 33                             | 10985              | 339791.5       | 0.000097                                                    | 0.000017                                        | 9.7                                                |
| 126-150                                                                           | 34                             | 10025              | 329253.5       | 0.000103                                                    | 0.000018                                        | 10.3                                               |
| 151-175                                                                           | 29                             | 9919               | 319247.5       | 0.000091                                                    | 0.000017                                        | 9.1                                                |
| 176-200                                                                           | 28                             | 8801               | 309858.5       | 0.00009                                                     | 0.000017                                        | 9.0                                                |
| 201-225                                                                           | 25                             | 8402               | 301229         | 0.000083                                                    | 0.000017                                        | 8.3                                                |
| 226-250                                                                           | 17                             | 7009               | 293498.5       | 0.000058                                                    | 0.000014                                        | 5.8                                                |
| 251-275                                                                           | 14                             | 6428               | 286763         | 0.000049                                                    | 0.000013                                        | 4.9                                                |
| 276-300                                                                           | 18                             | 6255               | 280407.5       | 0.000064                                                    | 0.000015                                        | 6.4                                                |
| 301-325                                                                           | 17                             | 5887               | 274318.5       | 0.000062                                                    | 0.000015                                        | 6.2                                                |
| 326-350                                                                           | 9                              | 8761               | 266977.5       | 0.000034                                                    | 0.000011                                        | 3.4                                                |
| 351-375                                                                           | 11                             | 17425              | 253875.5       | 0.000043                                                    | 0.000013                                        | 4.3                                                |
| 376-400                                                                           | 12                             | 21191              | 234556.5       | 0.000051                                                    | 0.000015                                        | 5.1                                                |
| 401-425                                                                           | 19                             | 20070              | 213914         | 0.000089                                                    | 0.00002                                         | 8.9                                                |
| 426-450                                                                           | 4                              | 19866              | 193927         | 0.000021                                                    | 0.00001                                         | 2.1                                                |
| 451-475                                                                           | 7                              | 19601              | 174189.5       | 0.00004                                                     | 0.000015                                        | 4.0                                                |
| 476-500                                                                           | 10                             | 18914              | 154925         | 0.000065                                                    | 0.00002                                         | 6.5                                                |
| 501-525                                                                           | 8                              | 19018              | 135949         | 0.000059                                                    | 0.000021                                        | 5.9                                                |
| 526-550                                                                           | 3                              | 17881              | 117491.5       | 0.000026                                                    | 0.000015                                        | 2.6                                                |
| 551-575                                                                           | 4                              | 17746              | 99675          | 0.00004                                                     | 0.00002                                         | 4.0                                                |
| 576-600                                                                           | 7                              | 17015              | 82290.5        | 0.000085                                                    | 0.000032                                        | 8.5                                                |
| 601-625                                                                           | 2                              | 15872              | 65840          | 0.00003                                                     | 0.000021                                        | 3.0                                                |
| 626-650                                                                           | 3                              | 15296              | 50254          | 0.00006                                                     | 0.000034                                        | 6.0                                                |
| 651-675                                                                           | 0                              | 15824              | 34691          | 0                                                           | 0                                               | 0                                                  |
| 676-700                                                                           | 0                              | 15871              | 18843.5        | 0                                                           | 0                                               | 0                                                  |
| 701-725                                                                           | 3                              | 10509              | 5653.5         | 0.000531                                                    | 0.000306                                        | 53.1                                               |
| 726-750                                                                           | 0                              | 392                | 200            | 0                                                           | 0                                               | 0                                                  |
| 751-775                                                                           | 0                              | 0                  | 4              | 0                                                           | 0                                               | 0                                                  |
| 776-800                                                                           | 0                              | 0                  | 4              | 0                                                           | 0                                               | 0                                                  |
| 801-825                                                                           | 0                              | 0                  | 4              | 0                                                           | 0                                               | 0                                                  |
| 826-850                                                                           | 0                              | 1                  | 3.5            | 0                                                           | 0                                               | 0                                                  |



|                                                                                     |    |      |         |          |          |      |
|-------------------------------------------------------------------------------------|----|------|---------|----------|----------|------|
| 851-875                                                                             | 0  | 0    | 3       | 0        | 0        | 0    |
| 876-900                                                                             | 0  | 0    | 3       | 0        | 0        | 0    |
| 901-925                                                                             | 0  | 0    | 3       | 0        | 0        | 0    |
| 926-950                                                                             | 0  | 0    | 3       | 0        | 0        | 0    |
| 951-975                                                                             | 0  | 0    | 3       | 0        | 0        | 0    |
| 976-1000                                                                            | 0  | 1    | 2.5     | 0        | 0        | 0    |
| 1001-1025                                                                           | 0  | 1    | 1.5     | 0        | 0        | 0    |
| 1026-1050                                                                           | 0  | 0    | 1       | 0        | 0        | 0    |
| 1051-1075                                                                           | 0  | 1    | 0.5     | 0        | 0        | 0    |
| 1076-1100                                                                           | 0  | 0    | 0       | 0        | 0        | 0    |
| <b>Patients Who Stopped Treatment with Opioids (31-90 Days Duration on Opioids)</b> |    |      |         |          |          |      |
| 1-25                                                                                | 29 | 5154 | 72116   | 0.000402 | 0.000075 | 40.2 |
| 26-50                                                                               | 26 | 4831 | 67094.5 | 0.000388 | 0.000076 | 38.8 |
| 51-75                                                                               | 10 | 3480 | 62913   | 0.000159 | 0.00005  | 15.9 |
| 76-100                                                                              | 13 | 3032 | 59647   | 0.000218 | 0.00006  | 21.8 |
| 101-125                                                                             | 11 | 2704 | 56766   | 0.000194 | 0.000058 | 19.4 |
| 126-150                                                                             | 8  | 2298 | 54254   | 0.000147 | 0.000052 | 14.7 |
| 151-175                                                                             | 4  | 2232 | 51981   | 0.000077 | 0.000038 | 7.7  |
| 176-200                                                                             | 5  | 1770 | 49976   | 0.0001   | 0.000045 | 10.0 |
| 201-225                                                                             | 4  | 1660 | 48256   | 0.000083 | 0.000041 | 8.3  |
| 226-250                                                                             | 5  | 1486 | 46679   | 0.000107 | 0.000048 | 10.7 |
| 251-275                                                                             | 8  | 1480 | 45191   | 0.000177 | 0.000063 | 17.7 |
| 276-300                                                                             | 6  | 1826 | 43530   | 0.000138 | 0.000056 | 13.8 |
| 301-325                                                                             | 1  | 2524 | 41349   | 0.000024 | 0.000024 | 2.4  |
| 326-350                                                                             | 2  | 3332 | 38420   | 0.000052 | 0.000037 | 5.2  |
| 351-375                                                                             | 1  | 3081 | 35211.5 | 0.000028 | 0.000028 | 2.8  |
| 376-400                                                                             | 3  | 3253 | 32043.5 | 0.000094 | 0.000054 | 9.4  |
| 401-425                                                                             | 3  | 2778 | 29025   | 0.000103 | 0.00006  | 10.3 |
| 426-450                                                                             | 3  | 2919 | 26173.5 | 0.000115 | 0.000066 | 11.5 |
| 451-475                                                                             | 3  | 2809 | 23306.5 | 0.000129 | 0.000074 | 12.9 |
| 476-500                                                                             | 0  | 2614 | 20592   | 0        | 0        | 0    |
| 501-525                                                                             | 0  | 2722 | 17924   | 0        | 0        | 0    |
| 526-550                                                                             | 1  | 2558 | 15284   | 0.000065 | 0.000065 | 6.5  |
| 551-575                                                                             | 1  | 2536 | 12736   | 0.000079 | 0.000079 | 7.9  |
| 576-600                                                                             | 0  | 2187 | 10373.5 | 0        | 0        | 0    |
| 601-625                                                                             | 1  | 2218 | 8171    | 0.000122 | 0.000122 | 12.2 |
| 626-650                                                                             | 0  | 2192 | 5965    | 0        | 0        | 0    |
| 651-675                                                                             | 0  | 2091 | 3823.5  | 0        | 0        | 0    |
| 676-700                                                                             | 0  | 2022 | 1767    | 0        | 0        | 0    |
| 701-725                                                                             | 0  | 733  | 389.5   | 0        | 0        | 0    |
| 726-750                                                                             | 0  | 21   | 12.5    | 0        | 0        | 0    |

|                                                                                      |     |       |          |          |          |      |
|--------------------------------------------------------------------------------------|-----|-------|----------|----------|----------|------|
| 751-775                                                                              | 0   | 1     | 1.5      | 0        | 0        | 0    |
| 776-800                                                                              | 0   | 0     | 1        | 0        | 0        | 0    |
| 801-825                                                                              | 0   | 0     | 1        | 0        | 0        | 0    |
| 826-850                                                                              | 0   | 0     | 1        | 0        | 0        | 0    |
| 851-875                                                                              | 0   | 0     | 1        | 0        | 0        | 0    |
| 876-900                                                                              | 0   | 0     | 1        | 0        | 0        | 0    |
| 901-925                                                                              | 0   | 0     | 1        | 0        | 0        | 0    |
| 926-950                                                                              | 0   | 0     | 1        | 0        | 0        | 0    |
| 951-975                                                                              | 0   | 0     | 1        | 0        | 0        | 0    |
| 976-1000                                                                             | 0   | 0     | 1        | 0        | 0        | 0    |
| 1001-1025                                                                            | 0   | 0     | 1        | 0        | 0        | 0    |
| 1026-1050                                                                            | 0   | 0     | 1        | 0        | 0        | 0    |
| 1051-1075                                                                            | 0   | 0     | 1        | 0        | 0        | 0    |
| 1076-1100                                                                            | 0   | 0     | 1        | 0        | 0        | 0    |
| 1101-1125                                                                            | 0   | 0     | 1        | 0        | 0        | 0    |
| 1126-1150                                                                            | 0   | 0     | 1        | 0        | 0        | 0    |
| 1151-1175                                                                            | 0   | 0     | 1        | 0        | 0        | 0    |
| 1176-1200                                                                            | 0   | 1     | 0.5      | 0        | 0        | 0    |
| 1201-1225                                                                            | 0   | 0     | 0        | 0        | 0        | 0    |
| <b>Patients Who Stopped Treatment with Opioids (91-400 Days Duration on Opioids)</b> |     |       |          |          |          |      |
| 1-25                                                                                 | 107 | 13422 | 184729   | 0.000579 | 0.000056 | 57.9 |
| 26-50                                                                                | 47  | 15122 | 170350   | 0.000276 | 0.00004  | 27.6 |
| 51-75                                                                                | 38  | 11131 | 157176.5 | 0.000242 | 0.000039 | 24.2 |
| 76-100                                                                               | 23  | 9557  | 146794.5 | 0.000157 | 0.000033 | 15.7 |
| 101-125                                                                              | 22  | 8206  | 137890   | 0.00016  | 0.000034 | 16.0 |
| 126-150                                                                              | 20  | 7173  | 130178.5 | 0.000154 | 0.000034 | 15.4 |
| 151-175                                                                              | 18  | 7299  | 122922.5 | 0.000146 | 0.000035 | 14.6 |
| 176-200                                                                              | 13  | 6565  | 115972.5 | 0.000112 | 0.000031 | 11.2 |
| 201-225                                                                              | 9   | 7267  | 109043.5 | 0.000083 | 0.000028 | 8.3  |
| 226-250                                                                              | 8   | 6865  | 101968.5 | 0.000078 | 0.000028 | 7.8  |
| 251-275                                                                              | 10  | 7102  | 94977    | 0.000105 | 0.000033 | 10.5 |
| 276-300                                                                              | 6   | 7033  | 87899.5  | 0.000068 | 0.000028 | 6.8  |
| 301-325                                                                              | 6   | 6867  | 80943.5  | 0.000074 | 0.00003  | 7.4  |
| 326-350                                                                              | 9   | 7067  | 73970.5  | 0.000122 | 0.000041 | 12.2 |
| 351-375                                                                              | 6   | 6187  | 67334.5  | 0.000089 | 0.000036 | 8.9  |
| 376-400                                                                              | 8   | 6266  | 61102    | 0.000131 | 0.000046 | 13.1 |
| 401-425                                                                              | 5   | 5553  | 55184.5  | 0.000091 | 0.000041 | 9.1  |
| 426-450                                                                              | 1   | 5540  | 49633    | 0.00002  | 0.00002  | 2.0  |
| 451-475                                                                              | 3   | 5154  | 44285    | 0.000068 | 0.000039 | 6.8  |
| 476-500                                                                              | 3   | 5049  | 39180.5  | 0.000077 | 0.000044 | 7.7  |
| 501-525                                                                              | 2   | 5199  | 34053.5  | 0.000059 | 0.000042 | 5.9  |

|                                                                                       |     |       |          |          |          |       |
|---------------------------------------------------------------------------------------|-----|-------|----------|----------|----------|-------|
| 526-550                                                                               | 0   | 4506  | 29199    | 0        | 0        | 0     |
| 551-575                                                                               | 1   | 4896  | 24498    | 0.000041 | 0.000041 | 4.1   |
| 576-600                                                                               | 1   | 4544  | 19777    | 0.000051 | 0.000051 | 5.1   |
| 601-625                                                                               | 1   | 4308  | 15350    | 0.000065 | 0.000065 | 6.5   |
| 626-650                                                                               | 0   | 4112  | 11139    | 0        | 0        | 0     |
| 651-675                                                                               | 1   | 3838  | 7164     | 0.00014  | 0.00014  | 14.0  |
| 676-700                                                                               | 2   | 3985  | 3251.5   | 0.000615 | 0.000435 | 61.5  |
| 701-725                                                                               | 0   | 1222  | 646      | 0        | 0        | 0     |
| 726-750                                                                               | 0   | 34    | 18       | 0        | 0        | 0     |
| 751-775                                                                               | 0   | 0     | 1        | 0        | 0        | 0     |
| 776-800                                                                               | 0   | 0     | 1        | 0        | 0        | 0     |
| 801-825                                                                               | 0   | 0     | 1        | 0        | 0        | 0     |
| 826-850                                                                               | 0   | 0     | 1        | 0        | 0        | 0     |
| 851-875                                                                               | 0   | 1     | 0.5      | 0        | 0        | 0     |
| 876-900                                                                               | 0   | 0     | 0        | 0        | 0        | 0     |
| <b>Patients Who Stopped Treatment with Opioids (&gt;400 Days Duration on Opioids)</b> |     |       |          |          |          |       |
| 1-25                                                                                  | 130 | 16175 | 124762.5 | 0.00104  | 0.000091 | 104.0 |
| 26-50                                                                                 | 42  | 15803 | 108643.5 | 0.000387 | 0.00006  | 38.7  |
| 51-75                                                                                 | 26  | 10379 | 95510.5  | 0.000272 | 0.000053 | 27.2  |
| 76-100                                                                                | 23  | 8251  | 86169.5  | 0.000267 | 0.000056 | 26.7  |
| 101-125                                                                               | 13  | 6898  | 78572    | 0.000165 | 0.000046 | 16.5  |
| 126-150                                                                               | 21  | 5956  | 72132    | 0.000291 | 0.000064 | 29.1  |
| 151-175                                                                               | 15  | 5805  | 66230.5  | 0.000226 | 0.000058 | 22.6  |
| 176-200                                                                               | 11  | 5011  | 60807.5  | 0.000181 | 0.000055 | 18.1  |
| 201-225                                                                               | 15  | 4829  | 55876.5  | 0.000268 | 0.000069 | 26.8  |
| 226-250                                                                               | 10  | 4311  | 51291.5  | 0.000195 | 0.000062 | 19.5  |
| 251-275                                                                               | 11  | 4222  | 47015    | 0.000234 | 0.000071 | 23.4  |
| 276-300                                                                               | 7   | 3857  | 42964.5  | 0.000163 | 0.000062 | 16.3  |
| 301-325                                                                               | 8   | 3700  | 39179    | 0.000204 | 0.000072 | 20.4  |
| 326-350                                                                               | 3   | 3562  | 35540    | 0.000084 | 0.000049 | 8.4   |
| 351-375                                                                               | 6   | 3190  | 32161    | 0.000187 | 0.000076 | 18.7  |
| 376-400                                                                               | 4   | 3165  | 28977.5  | 0.000138 | 0.000069 | 13.8  |
| 401-425                                                                               | 5   | 2714  | 26034    | 0.000192 | 0.000086 | 19.2  |
| 426-450                                                                               | 4   | 2714  | 23315    | 0.000172 | 0.000086 | 17.2  |
| 451-475                                                                               | 1   | 2526  | 20691    | 0.000048 | 0.000048 | 4.8   |
| 476-500                                                                               | 2   | 2556  | 18149    | 0.00011  | 0.000078 | 11.0  |
| 501-525                                                                               | 0   | 2548  | 15595    | 0        | 0        | 0     |
| 526-550                                                                               | 1   | 2267  | 13187.5  | 0.000076 | 0.000076 | 7.6   |
| 551-575                                                                               | 3   | 2385  | 10860.5  | 0.000276 | 0.000159 | 27.6  |
| 576-600                                                                               | 1   | 2157  | 8586.5   | 0.000116 | 0.000116 | 11.6  |
| 601-625                                                                               | 0   | 1915  | 6549.5   | 0        | 0        | 0     |

|         |   |      |        |          |          |      |
|---------|---|------|--------|----------|----------|------|
| 626-650 | 0 | 1956 | 4614   | 0        | 0        | 0    |
| 651-675 | 1 | 1630 | 2821   | 0.000354 | 0.000354 | 35.4 |
| 676-700 | 0 | 1697 | 1156.5 | 0        | 0        | 0    |
| 701-725 | 0 | 298  | 159    | 0        | 0        | 0    |
| 726-750 | 0 | 9    | 5.5    | 0        | 0        | 0    |
| 751-775 | 0 | 1    | 0.5    | 0        | 0        | 0    |
| 776-800 | 0 | 0    | 0      | 0        | 0        | 0    |
